# Supplementary material for: A Study of Drug Repurposing to Identify SARS-CoV-2 Main Protease (3CLpro) Inhibitors
Source: MDPI journal article supplement (doi:10.3390/ijms23126468), 2022-06-09
Supplement: s1 [file s1]

# A Study of Drug Repurposing to Identify SARS-CoV-2 3CLpro Inhibitors

Seri Jo<sup>1†</sup>, Luca Signorile<sup>2†</sup>, Suwon Kim<sup>1</sup>, Mi-Sun Kim<sup>1</sup>, Oscar Huertas<sup>2</sup>, Raúl Insa<sup>2</sup>, Núria Reig<sup>2\*</sup> and

Dong Hae Shin<sup>1\*</sup>

<sup>1</sup> College of Pharmacy and Graduates School of Pharmaceutical Sciences, Ewha W. University,

Seoul, Republic of Korea 03760

<sup>2</sup> SOM Innovation Biotech SA. Baldiri Reixac, 4, 08028 Barcelona, Spain

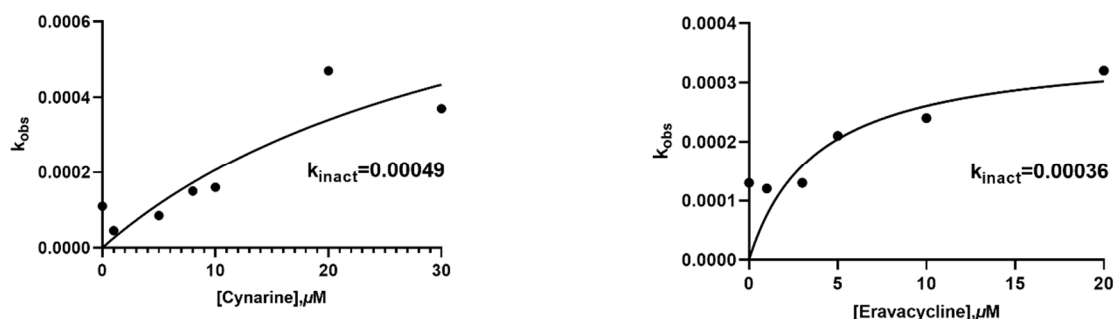

**Supplementary Figure S1.** In the kinetic studies, 2  $\mu M$  SARS-CoV-2 3CLpro was added to a solution containing various concentrations of protease inhibitors and 2.5  $\mu M$  FRET substrate to initiate the reaction. The reaction was then monitored for 2 h. Detailed methods were described in “Materials and methods” section.

**Supplementary Table S1.** 30 chemical list.

| <b>Compound name</b>       | <b>CAS</b>   | <b>Docking (Covalent)</b> |
|----------------------------|--------------|---------------------------|
| CYNARIN                    | 30964-13-7   | -7,020 (-7,747)           |
| RUPINTRIVIR                | 223537-30-2  | -8,557 (-6,510)           |
| ERAVACYCLINE diHcl         | 1334714-66-7 | -6,458 (-6,090)           |
| TELAPREVIR                 | 402957-28-2  | -8,854                    |
| COBICISTAT                 | 1004316-88-4 | -8,656                    |
| BITOLTEROL mesylate        | 30392-41-7   | -8,028                    |
| OLCEGEPANT                 | 204697-65-4  | -7,832                    |
| EPIRUBICIN HCl             | 56390-09-1   | -7,826                    |
| VORUCICLIB HCl             | 1000023-05-1 | -7,793                    |
| AZIMILIDE diHcl            | 149888-94-8  | -7,642                    |
| FLORIFENINE                | 83863-79-0   | -7,597                    |
| DIQUAFOSOL TETRASODIUM     | 211427-08-6  | -7,551                    |
| UDENAFIL                   | 268203-93-6  | -7,415                    |
| TAFENOQUINE succinate      | 106635-81-8  | -7,362                    |
| DARAPLADIB                 | 356057-34-6  | -7,295                    |
| LAPATINIB DITOSYLATE       | 388082-77-7  | -7,234                    |
| OPROZOMIB                  | 935888-69-0  | -7,223                    |
| ZARAGOZIC ACID A trisodium | 144541-82-2  | -7,159                    |
| POLDINE METHYLSULFATE      | 545-80-2     | -7,124                    |
| PIPEQUALINE                | 77472-98-1   | -7,081                    |
| LASMIDITAN HCl             | 613677-28-4  | -6,896                    |
| RACTOPAMINE HCl            | 90274-24-1   | -6,878                    |
| TOZASERTIB                 | 639089-54-6  | -7,208                    |
| ETAFENONE HCl              | 2192-21-4    | -6,917                    |
| RIMCAZOLE diHCl            | 75859-03-9   | -6,876                    |
| PIBENZIMOL                 | 23491-45-4   | -5,977                    |
| SALMETEROL                 | 89365-50-4   | -6,797                    |
| PREXASERTIB diHCl          | 1234015-54-3 | -6,558                    |
| ABEXINOSTAT                | 783355-60-2  | -6,161                    |
| DANUSERIB                  | 827318-97-8  | -5,734                    |
